# Supplementary material
Source: PubMed Central journal article supplement (PMC3250185)
Supplement: 1112901108_pnas.201112901SI.pdf [file 1112901108_pnas.201112901SI.pdf]

# Supporting Information

Bukiya et al. 10.1073/pnas.1112901108

## SI Materials and Methods

**Characterization of Functional Coupling Between Channel-Forming Cbv1 and WT or Mutated R $\beta$ 1-Subunits.** The presence of voltage- and calcium-gated potassium channels (BK)  $\beta$ 1 subunits functionally coupled to BK channel-forming (cbv1)  $\alpha$ -subunits was confirmed by the introduction of macroscopic current slow activation kinetics compared with the kinetics of currents mediated by homomeric BK  $\alpha$ -channels (1, 2), which was previously described for cbv1 subunits (3). After excision of inside-out macropatches from the oocytes, a depolarizing 200-ms-long voltage step from 0 to +80 mV was applied. Activation data were fitted with a single exponential function using a Chebyshev approximation to obtain the activation time constant ( $\tau_{act}$ ). This procedure was performed using a built-in option in Clampfit 9.2 (Molecular Devices).

**Electrophysiological Recording and Following Analysis of cbv1 + R $\beta$ 1T165,L157,L158 Macroscopic Currents.** Oocytes were prepared for patch-clamping as described (4), with the inside-out configuration being used to record macroscopic ionic current. Bath and electrode solutions contained 130 mM Kgluconate, 5 mM EGTA, 1.6 mM HEDTA, 2.28 mM MgCl<sub>2</sub> ( $[Mg^{2+}]_{free} = 1$  mM), 15 mM Hepes, 5.22 mM CaCl<sub>2</sub> ( $[Ca^{2+}]_{free} = 10$   $\mu$ M), pH 7.35. Free Ca<sup>2+</sup> and Mg<sup>2+</sup> were calculated using Max Chelator (C. Patton,

Stanford University, Palo Alto, CA) and validated experimentally with Ca<sup>2+</sup>-sensitive/reference electrodes (Corning) (5).

Patch pipettes were pulled from glass capillaries (Drummond) (1). The procedure gave tip resistances of 5–7 M $\Omega$  when filled with electrode solution. An Ag/AgCl electrode was used as ground electrode. Experiments were carried out at room temperature (21  $^{\circ}$ C). BK currents were acquired using an EPC8 (HEKA) amplifier and digitized at 1 kHz using a Digidata 1320A A/D converter and pCLAMP8 software (Molecular Devices). Macroscopic currents were evoked from a holding potential of –80 mV by 200-ms-long, 10-mV depolarizing steps from –150 to +150 mV. Currents were low pass-filtered at 1 kHz with an eight-pole Bessel filter 902LPF (Frequency Devices) and sampled at 5 kHz. Current amplitude was averaged within 100–150 ms after the start of the depolarizing step.

Macroscopic conductance ( $G$ )– $V$  plots were fitted to a Boltzmann function of the type  $G(V) = G_{max}/1 + \exp[(-V + V_{1/2})/k]$ . Boltzmann fitting routines were run using the Levenberg–Marquardt algorithm to perform nonlinear least squares fits.

**Data Fitting and Plotting.** Data fitting and plotting were performed using Clampfit 9.2 (Molecular Devices) and Origin 7.0 (Originlab).

1. Orio P, Rojas P, Ferreira G, Latorre R (2002) New disguises for an old channel: MaxiK channel beta-subunits. *News Physiol Sci* 17:156–161.
2. Brenner R, Jegla TJ, Wickenden A, Liu Y, Aldrich RW (2000) Cloning and functional characterization of novel large conductance calcium-activated potassium channel beta subunits, hKCNMB3 and hKCNMB4. *J Biol Chem* 275:6453–6461.
3. Bukiya AN, Vaithianathan T, Toro L, Dopico AM (2009) Channel beta2-4 subunits fail to substitute for beta1 in sensitizing BK channels to lithocholate. *Biochem Biophys Res Commun* 390:995–1000.
4. Dopico AM, Anantharam V, Treisman SN (1998) Ethanol increases the activity of Ca<sup>(+++)</sup>-dependent K<sup>+</sup> (mslo) channels: Functional interaction with cytosolic Ca<sup>++</sup>. *J Pharmacol Exp Ther* 284:258–268.
5. Dopico AM (2003) Ethanol sensitivity of BK<sub>Ca</sub> channels from arterial smooth muscle does not require the presence of the beta 1-subunit. *Am J Physiol Cell Physiol* 284: C1468–C1480.
